# Supplementary material
Source: MDPI journal article supplement (https://www.mdpi.com/1999-4907/13/7/1148)
Supplement: s1 [file s1]

## Supplementary Material

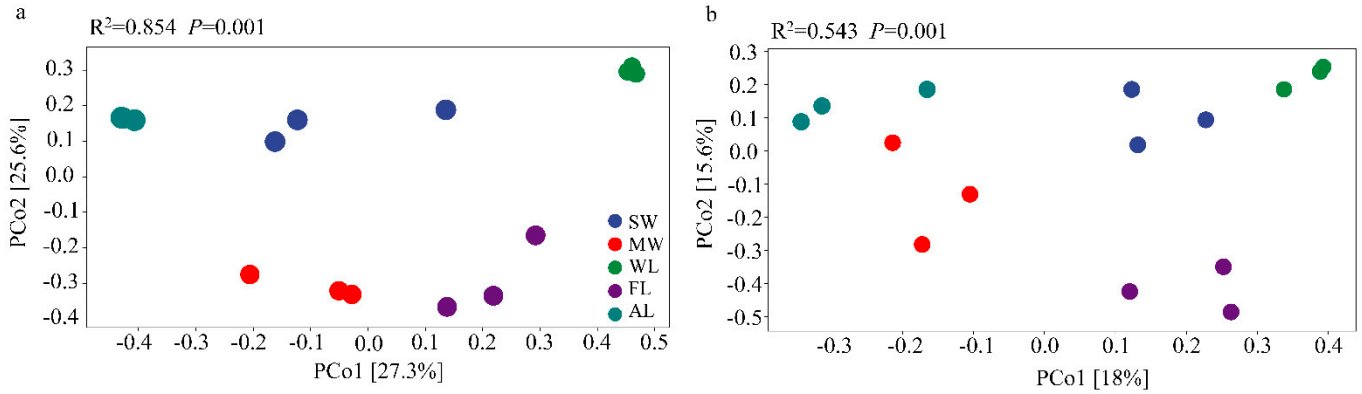

Figure S1. The nonmetric multidimensional scaling ordinations based on bray-cuits distance of (a) bacterial and (b) fungal communities in different land-use types. SW, Swamp wet-land; MW, Meadow wetland; WL, Woodland; FL, Farmland; AL, Alkaline land.

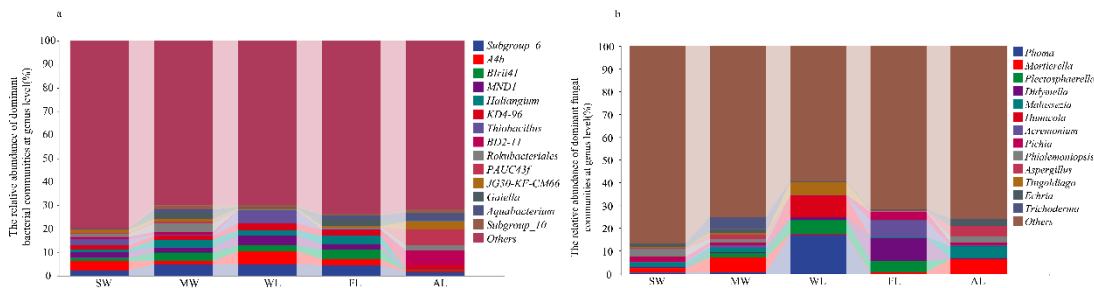

Figure S2 Soil (a) bacterial and (b) fungal community composition at the genus level. Different colors indicate different microorganisms at the levels. SW, Swamp wetland; MW, Meadow wetland; WL, Woodland; FL, Farmland; AL, Alkaline land.

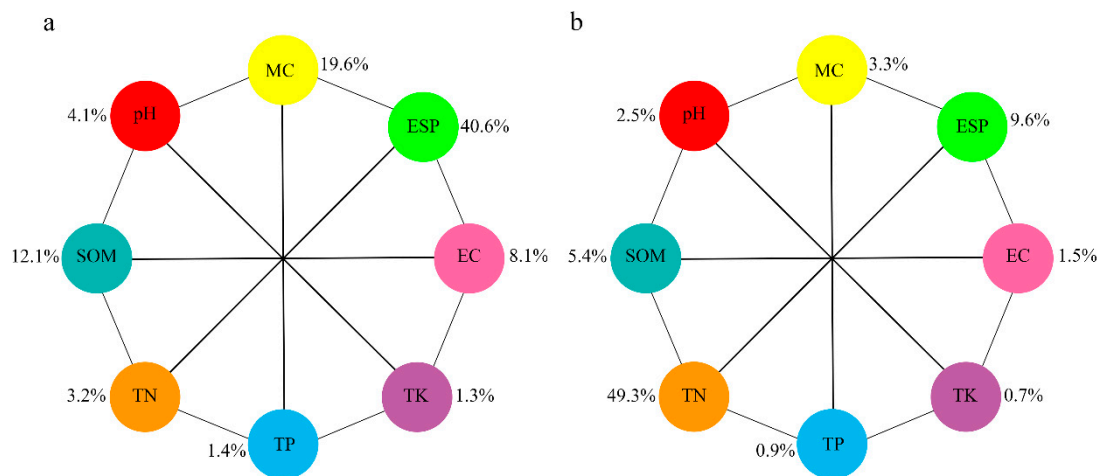

Figure S3. Variance partitioning analysis (VPA) showing the effects of soil factors on soil microbial community. (a) Bacterial community; (b) fungal community. SW, Swamp wetland; MW, Meadow wetland; WL, Woodland; FL, Farmland; AL, Alkaline land. MC, moisture content; SOM, soil organic matter; TN, total nitrogen; TP, Total Phosphorus; TK, Total Kalium; ESP, Exchange sodium percent.

Table S1 The relative abundance (>1%) of the total metabolic pathways at level 2

| Pathways              | WL            | SW            | FL            | MW             | AL            | P value |
|-----------------------|---------------|---------------|---------------|----------------|---------------|---------|
| Amino acid metabolism | 5445.95±23.80 | 5495.85±66.96 | 5766.79±45.83 | 5758.71±114.63 | 5882.39±93.94 | 0.002   |

|                                             |               |               |                |                |                |       |
|---------------------------------------------|---------------|---------------|----------------|----------------|----------------|-------|
| Carbohydrate metabolism                     | 5380.44±16.72 | 5489.90±42.20 | 5754.42±23.14  | 5763.96±115.42 | 5833.55±160.44 | 0.000 |
| Metabolism of cofactors and vitamins        | 5083.70±34.85 | 5300.28±77.52 | 5106.37±105.49 | 5382.52±65.81  | 5577.61±114.53 | 0.001 |
| Metabolism of terpenoids and polyketides    | 4061.27±45.69 | 4154.72±79.63 | 4419.09±37.32  | 4583.73±139.19 | 4554.47±189.41 | 0.000 |
| Metabolism of other amino acids             | 3458.86±16.92 | 3412.75±21.73 | 3443.30±27.14  | 3462.07±43.38  | 3456.26±43.35  | 0.359 |
| Lipid metabolism                            | 2899.16±48.17 | 2708.57±14.33 | 3171.08±78.92  | 2922.87±47.67  | 2881.37±25.97  | 0.004 |
| Xenobiotics biodegradation and metabolism   | 2349.78±18.51 | 2056.77±15.02 | 2821.41±158.35 | 2320.87±71.68  | 2139.60±37.76  | 0.085 |
| Energy metabolism                           | 2229.45±13.11 | 2274.58±22.03 | 2220.73±25.82  | 2277.37±26.50  | 2298.05±35.85  | 0.007 |
| Replication and repair                      | 2135.39±14.61 | 2212.58±29.74 | 2192.88±36.74  | 2296.51±45.04  | 2373.71±73.47  | 0.001 |
| Folding, sorting and degradation            | 1415.99±22.31 | 1446.85±27.83 | 1390.30±30.30  | 1494.09±35.10  | 1508.50±46.82  | 0.001 |
| Glycan biosynthesis and metabolism          | 1275.94±9.77  | 1386.93±18.54 | 1201.16±23.66  | 1279.51±9.82   | 1281.21±23.13  | 0.001 |
| Translation                                 | 1192.51±20.30 | 1274.75±34.02 | 1191.21±41.81  | 1314.85±36.64  | 1384.96±61.14  | 0.550 |
| Biosynthesis of other secondary metabolites | 1094.82±12.93 | 989.97±29.73  | 1258.18±12.13  | 1207.39±85.91  | 1028.40±53.26  | 0.000 |
| Cell motility                               | 1080.81±25.94 | 1083.60±22.69 | 886.89±47.46   | 953.16±34.42   | 1065.85±63.45  | 0.000 |
| Nucleotide metabolism                       | 669.39±3.89   | 701.87±9.31   | 676.92±14.09   | 713.02±9.98    | 749.13±21.25   | 0.000 |
| Membrane transport                          | 699.81±3.42   | 691.91±8.97   | 695.06±12.87   | 684.06±9.46    | 705.82±21.78   | 0.729 |
| Cell growth and death                       | 622.00±5.10   | 635.82±7.00   | 580.90±14.92   | 619.00±17.84   | 627.45±10.97   | 0.000 |
| Transcription                               | 357.38±4.86   | 364.66±6.32   | 377.76±8.62    | 395.91±11.66   | 395.90±12.72   | 0.000 |
| Signal transduction                         | 199.40±2.58   | 182.89±3.51   | 183.77±2.42    | 178.87±4.76    | 171.35±12.45   | 0.000 |
| Transport and catabolism                    | 144.79±2.88   | 138.66±5.19   | 165.38±3.85    | 151.06±2.19    | 143.05±0.26    | 0.018 |
| Environmental adaptation                    | 73.01±0.32    | 75.10±0.81    | 69.66±1.85     | 71.38±1.30     | 71.60±2.61     | 0.000 |
| Cellular community - prokaryotes            | 69.09±0.94    | 72.16±0.37    | 60.21±2.05     | 68.31±2.70     | 68.83±3.39     | 0.000 |
| Infectious diseases                         | 46.37±0.94    | 40.25±1.40    | 50.43±4.91     | 41.36±2.98     | 31.43±4.48     | 0.000 |
| Neurodegenerative diseases                  | 35.11±1.07    | 31.06±1.26    | 31.93±9.30     | 34.48±17.66    | 25.71±2.53     | 0.381 |
| Endocrine system                            | 30.06±0.50    | 29.73±0.31    | 29.14±0.92     | 30.25±0.10     | 28.08±0.34     | 0.001 |
| Immune system                               | 14.81±0.35    | 5.82±10.07    | 12.95±0.71     | 9.04±7.84      | 10.61±1.56     | 0.000 |
| Digestive system                            | 11.30±0.24    | 10.62±0.94    | 11.07±0.65     | 9.58±0.18      | 7.74±0.26      | 0.000 |
| Cancers                                     | 9.91±8.59     | 4.46±7.72     | 11.64±0.16     | 11.41±0.36     | 7.26±6.33      | 0.482 |
| Cardiovascular diseases                     | 1.73±0.12     | 1.10±0.21     | 1.86±0.28      | 1.66±0.19      | 0.33±0.06      | 0.000 |

SW, Swamp wetland; MW, Meadow wetland; WL, Woodland; FL, Farmland; AL, Alkaline land.

Table S2 Relative abundance (%) of fungal functional group (guild) from selected soil samples inferred by FunGuild

| Guild                  | WL                | SW              | MW                | FL               | AL              | P value |
|------------------------|-------------------|-----------------|-------------------|------------------|-----------------|---------|
| Animal Pathogen        | 13805.67±18755.80 | 3176.67±1513.79 | 25529.33±17316.17 | 11209.67±6040.44 | 14429.00±675.30 | 0.256   |
| Plant Pathogen         | 10771.00±20410.33 | 1617.00±222.38  | 5630.00±3309.98   | 11670.00±4560.02 | 2865.67±878.66  | 0.211   |
| Arbuscular Mycorrhizal | 0.00±0.00         | 2.33±3.30       | 955.67±489.29     | 40.67±39.41      | 102.00±144.25   | 0.008   |
| Ectomycorrhizal        | 614.33±844.49     | 1118.00±759.00  | 414.33±261.80     | 1676.33±443.49   | 2138.33±798.77  | 0.062   |
| Endophyte              | 28916.33±9028.08  | 2318.00±1875.64 | 1492.00±283.83    | 10034.00±5114.33 | 9888.00±3838.62 | 0.000   |
| Lichenized             | 1.67±5.24         | 0.00±0.00       | 0.00±0.00         | 0.00±0.00        | 0.00±0.00       | 0.452   |
| Orchid Mycorrhizal     | 0.00±0.00         | 6.67±9.43       | 0.00±0.00         | 0.00±0.00        | 0.00±0.00       | 0.452   |
| Dung Saprotroph        | 1759.33±770.40    | 1218.33±940.96  | 1525.33±453.70    | 6301.00±3833.48  | 1220.67±516.88  | 0.074   |

|                                                                                                                                                                                         |                   |                   |                   |                  |                   |       |
|-----------------------------------------------------------------------------------------------------------------------------------------------------------------------------------------|-------------------|-------------------|-------------------|------------------|-------------------|-------|
| Fungal Parasite                                                                                                                                                                         | 2736.00±5605.50   | 2264.00±1196.30   | 1160.67±433.91    | 2933.33±600.86   | 2454.67±480.13    | 0.698 |
| Leaf Saprotroph                                                                                                                                                                         | 1.00±3.15         | 0.00±0.00         | 0.00±0.00         | 0.00±0.00        | 0.00±0.00         | 0.452 |
| Plant Saprotroph                                                                                                                                                                        | 49.33±46.39       | 30.33±29.80       | 456.00±258.54     | 253.33±166.18    | 589.00±458.54     | 0.173 |
| Soil Saprotroph                                                                                                                                                                         | 49.00±82.67       | 38.00±43.57       | 56.33±75.46       | 224.00±160.67    | 275.00±309.25     | 0.468 |
| Undefined<br>Saprotroph                                                                                                                                                                 | 22274.67±26615.68 | 5019.67±2295.98   | 8314.33±1777.29   | 23910.67±3777.84 | 18758.67±5254.75  | 0.042 |
| Wood Saprotroph                                                                                                                                                                         | 64.67±89.61       | 319.00±169.60     | 57.67±70.24       | 1092.00±209.02   | 204.67±172.96     | 0.000 |
| Animal Parasite-<br>Fungal Parasite                                                                                                                                                     | 98.67±34.77       | 21.00±29.70       | 181.67±122.61     | 74.67±105.59     | 203.00±174.95     | 0.457 |
| Animal<br>Endosymbiont                                                                                                                                                                  | 596.00±1228.13    | 1430.33±1571.59   | 5136.00±6594.69   | 1567.33±772.39   | 1623.67±637.06    | 0.635 |
| Ericoid<br>Mycorrhizal                                                                                                                                                                  | 15.00±47.19       | 38.33±54.21       | 57.00±67.62       | 0.00±0.00        | 0.00±0.00         | 0.559 |
| Clavicipitaceous<br>Endophyte-Plant<br>Pathogen                                                                                                                                         | 3.67±11.54        | 2.33±3.30         | 0.00±0.00         | 41.33±58.45      | 176.67±206.25     | 0.353 |
| Algal Parasite--<br>Leaf Saprotroph-<br>Wood Saprotroph<br>Bryophyte Parasite-<br>Lichen Parasite-<br>Ectomycorrhizal-<br>Ericoid<br>Mycorrhizal-<br>Undefined<br>Saprotroph<br>unknown | 0.00±0.00         | 8.00±11.31        | 0.00±0.00         | 0.00±0.00        | 0.00±0.00         | 0.452 |
|                                                                                                                                                                                         | 32.67±57.91       | 54.00±76.37       | 0.00±0.00         | 0.00±0.00        | 0.00±0.00         | 0.474 |
|                                                                                                                                                                                         | 65249.67±53353.54 | 57116.00±26904.45 | 84305.00±46216.96 | 44108.67±3293.51 | 62175.33±10127.48 | 0.672 |
